# Supplementary material for: Co-doped long persistent luminescence materials LiSr3SiO4Cl3:Eu2+,Ln3+ (Ln = Dy, Ho, Er): construction and verification of VRBE and HRBE scheme and their multifunctional applications
Source: Royal Society of Chemistry journal article supplement (doi:10.1039/d3qi01045g), 2023-01-01
Supplement: d3qi01045g1.pdf [file d3qi01045g1.pdf]

## Supporting Information

|                                                                                                          | Stoichiometric composition                                                                               | Notation              |
|----------------------------------------------------------------------------------------------------------|----------------------------------------------------------------------------------------------------------|-----------------------|
| <b>Group I</b>                                                                                           | $\text{LiSr}_{2.964}\text{SiO}_4\text{Cl}_3:0.036\text{Eu}^{2+}$                                         | <b>LSSOC:Eu</b>       |
|                                                                                                          | $\text{LiSr}_{2.964}\text{SiO}_4\text{Cl}_3:0.036\text{Eu}^{2+},0.018\text{Dy}^{3+}$                     | <b>LSSOC:Eu,Dy</b>    |
|                                                                                                          | $\text{LiSr}_{2.964}\text{SiO}_4\text{Cl}_3:0.036\text{Eu}^{2+},0.018\text{Ho}^{3+}$                     | <b>LSSOC:Eu,Ho</b>    |
|                                                                                                          | $\text{LiSr}_{2.964}\text{SiO}_4\text{Cl}_3:0.036\text{Eu}^{2+},0.018\text{Er}^{3+}$                     | <b>LSSOC:Eu,Er</b>    |
| <b>Group II</b>                                                                                          | $\text{LiSr}_3\text{SiO}_4\text{Cl}_3$                                                                   | <b>LSSOC</b>          |
|                                                                                                          | $\text{LiSr}_{2.97}\text{SiO}_4\text{Cl}_3:0.03\text{Pr}^{3+}$                                           | <b>LSSOC:Pr</b>       |
|                                                                                                          | $\text{LiSr}_{2.97}\text{SiO}_4\text{Cl}_3:0.03\text{Ce}^{3+}$                                           | <b>LSSOC:Ce</b>       |
| <b>Group III</b>                                                                                         | $\text{LiSr}_{2.964}\text{SiO}_4\text{Cl}_3:0.036\text{Eu}^{2+},0.009\text{Dy}^{3+},0.009\text{Ho}^{3+}$ | <b>LSSOC:Eu,Dy,Ho</b> |
|                                                                                                          | $\text{LiSr}_{2.964}\text{SiO}_4\text{Cl}_3:0.036\text{Eu}^{2+},0.009\text{Dy}^{3+},0.009\text{Er}^{3+}$ | <b>LSSOC:Eu,Dy,Er</b> |
|                                                                                                          | $\text{LiSr}_{2.964}\text{SiO}_4\text{Cl}_3:0.036\text{Eu}^{2+},0.009\text{Dy}^{3+},0.009\text{Mn}^{2+}$ | <b>LSSOC:Eu,Dy,Mn</b> |
|                                                                                                          | $\text{LiSr}_{2.964}\text{SiO}_4\text{Cl}_3:0.036\text{Eu}^{2+},0.009\text{Dy}^{3+},0.009\text{Nd}^{3+}$ | <b>LSSOC:Eu,Dy,Nd</b> |
|                                                                                                          | $\text{LiSr}_{2.964}\text{SiO}_4\text{Cl}_3:0.036\text{Eu}^{2+},0.009\text{Dy}^{3+},0.009\text{Pr}^{3+}$ | <b>LSSOC:Eu,Dy,Pr</b> |
|                                                                                                          | $\text{LiSr}_{2.964}\text{SiO}_4\text{Cl}_3:0.036\text{Eu}^{2+},0.009\text{Ho}^{3+},0.009\text{Er}^{3+}$ | <b>LSSOC:Eu,Ho,Er</b> |
|                                                                                                          | $\text{LiSr}_{2.964}\text{SiO}_4\text{Cl}_3:0.036\text{Eu}^{2+},0.009\text{Ho}^{3+},0.009\text{Mn}^{2+}$ | <b>LSSOC:Eu,Ho,Mn</b> |
|                                                                                                          | $\text{LiSr}_{2.964}\text{SiO}_4\text{Cl}_3:0.036\text{Eu}^{2+},0.009\text{Ho}^{3+},0.009\text{Nd}^{3+}$ | <b>LSSOC:Eu,Ho,Nd</b> |
|                                                                                                          | $\text{LiSr}_{2.964}\text{SiO}_4\text{Cl}_3:0.036\text{Eu}^{2+},0.009\text{Ho}^{3+},0.009\text{Pr}^{3+}$ | <b>LSSOC:Eu,Ho,Pr</b> |
|                                                                                                          | $\text{LiSr}_{2.964}\text{SiO}_4\text{Cl}_3:0.036\text{Eu}^{2+},0.009\text{Er}^{3+},0.009\text{Mn}^{2+}$ | <b>LSSOC:Eu,Er,Mn</b> |
|                                                                                                          | $\text{LiSr}_{2.964}\text{SiO}_4\text{Cl}_3:0.036\text{Eu}^{2+},0.009\text{Er}^{3+},0.009\text{Nd}^{3+}$ | <b>LSSOC:Eu,Er,Nd</b> |
|                                                                                                          | $\text{LiSr}_{2.964}\text{SiO}_4\text{Cl}_3:0.036\text{Eu}^{2+},0.009\text{Er}^{3+},0.009\text{Pr}^{3+}$ | <b>LSSOC:Eu,Er,Pr</b> |
|                                                                                                          | $\text{LiSr}_{2.964}\text{SiO}_4\text{Cl}_3:0.036\text{Eu}^{2+},0.009\text{Mn}^{2+},0.009\text{Nd}^{3+}$ | <b>LSSOC:Eu,Mn,Nd</b> |
|                                                                                                          | $\text{LiSr}_{2.964}\text{SiO}_4\text{Cl}_3:0.036\text{Eu}^{2+},0.009\text{Mn}^{2+},0.009\text{Pr}^{3+}$ | <b>LSSOC:Eu,Mn,Pr</b> |
| $\text{LiSr}_{2.964}\text{SiO}_4\text{Cl}_3:0.036\text{Eu}^{2+},0.009\text{Nd}^{3+},0.009\text{Pr}^{3+}$ | <b>LSSOC:Eu,Nd,Pr</b>                                                                                    |                       |

Table S1. Stoichiometric compositions and notations of the samples. Group I is the  $\text{Eu}^{2+}$ -activated samples. Group II and III are used to construct and verify the host-referred binding energy and vacuum-referred binding energy (HRBE and VRBE) schemes.

|                           |                                                      |
|---------------------------|------------------------------------------------------|
| <b>Formula</b>            | <b>LiSr<sub>3</sub>SiO<sub>4</sub>Cl<sub>3</sub></b> |
| <b>Crystal system</b>     | <b>orthorhombic</b>                                  |
| <b>Space group</b>        | <b><i>Pmna</i>(53)</b>                               |
| <b>Lattice parameters</b> |                                                      |
| <i>a</i> (Å)              | <i>a</i> =9.4695 Å                                   |
| <i>b</i> (Å)              | <i>b</i> =6.9952 Å                                   |
| <i>c</i> (Å)              | <i>c</i> =13.6800 Å                                  |
| <b>R-Factors</b>          |                                                      |
| <i>R</i> <sub>wp</sub>    | 11.93%                                               |
| <i>R</i> <sub>p</sub>     | 9.22%                                                |

Table S2 XRD refined parameters of the LSSOC host

| Atom | Ox. | Wyck. | x/a    | y/b    | z/c    |
|------|-----|-------|--------|--------|--------|
| Li1  | 1   | 2d    | 0      | 1/2    | 0      |
| Li2  | 1   | 2c    | 0      | 1/2    | 1/2    |
| O1   | -2  | 4h    | 0      | 0.5774 | 0.1605 |
| O2   | -2  | 8i    | 0.6395 | 0.0885 | 0.6485 |
| O3   | -2  | 4h    | 0      | 0.2276 | 0.0082 |
| Sr1  | 2   | 4h    | 0      | 0.2220 | 0.1894 |
| Sr2  | 2   | 4e    | 0.2406 | 0      | 1/2    |
| Sr3  | 2   | 4g    | 1/4    | 0.6701 | 1/4    |
| Si1  | 4   | 4h    | 0      | 0.7918 | 0.1115 |
| Cl1  | -1  | 4h    | 0      | 0.1985 | 0.6071 |
| Cl2  | -1  | 8i    | 0.1834 | 0.3348 | 0.3736 |

Table S3 relevant cell parameters of the LSSOC host

| Type | Atom | Bond Length (Å) | Average Bond Length (Å) |
|------|------|-----------------|-------------------------|
| Eu1  | O3   | 2.479           | 2.870                   |
|      | O1   | 2.517           |                         |
|      | O2   | 2.603           |                         |
|      | O2   | 2.603           |                         |
|      | Cl2  | 3.160           |                         |
|      | Cl2  | 3.160           |                         |
|      | Cl2  | 3.218           |                         |
| Eu2  | O2   | 2.408           | 2.804                   |
|      | O2   | 2.408           |                         |
|      | Cl2  | 2.961           |                         |
|      | Cl2  | 2.961           |                         |
|      | Cl1  | 3.044           |                         |
|      | Cl1  | 3.044           |                         |
|      | O2   | 2.424           |                         |
|      | O2   | 2.424           |                         |
| Eu3  | O1   | 2.743           | 2.833                   |
|      | O1   | 2.743           |                         |
|      | Cl2  | 2.959           |                         |
|      | Cl2  | 2.959           |                         |
|      | Cl1  | 3.205           |                         |
|      | Cl1  | 3.205           |                         |

Table S4 bond length of the adjacent pairs in Eu1, Eu2, and Eu3.

| <b>n</b> | <b>Ln</b> | $\Delta E(n+1,7,2+)$ | $E_{fd}(n+1,2+,free)$ | $\Delta E(n,6,3+)$ | $E_{fd}(n,3+,free)$ | $E_{exch}(n,3+,F)$ |
|----------|-----------|----------------------|-----------------------|--------------------|---------------------|--------------------|
| 0        | La        | 5.61                 | -0.94                 | -                  | -                   |                    |
| 1        | Ce        | 4.13                 | -0.35                 | 5.24               | 6.12                |                    |
| 2        | Pr        | 2.87                 | 1.56                  | 3.39               | 7.63                |                    |
| 3        | Nd        | 2.43                 | 1.93                  | 1.9                | 8.92                |                    |
| 4        | Pm        | 2.34                 | 1.96                  | 1.46               | 9.24                |                    |
| 5        | Sm        | 1.25                 | 3                     | 1.27               | 9.34                |                    |
| 6        | Eu        | 0                    | 4.22                  | 0                  | 10.5                |                    |
| 7        | Gd        | 4.56                 | -0.2                  | -1.34              | 11.8                |                    |
| 8        | Tb        | 3.31                 | 1.19                  | 3.57               | 7.78                | 1.0                |
| 9        | Dy        | 2.27                 | 2.17                  | 2.15               | 9.25                | 0.74               |
| 10       | Ho        | 2.4                  | 2.25                  | 1.05               | 10.1                | 0.51               |
| 11       | Er        | 2.58                 | 2.12                  | 1.12               | 9.86                | 0.35               |
| 12       | Tm        | 1.72                 | 2.95                  | 1.28               | 9.75                | 0.28               |
| 13       | Yb        | 0.433                | 4.22                  | 0.236              | 10.89               | 0.22               |
| 14       | Lu        | -                    |                       | -1.02              | 12.26               | 0.15               |

Table S5 Parameter values (in eV) that define the 4f and 5d binding energy curves for the divalent and trivalent lanthanides in compounds.

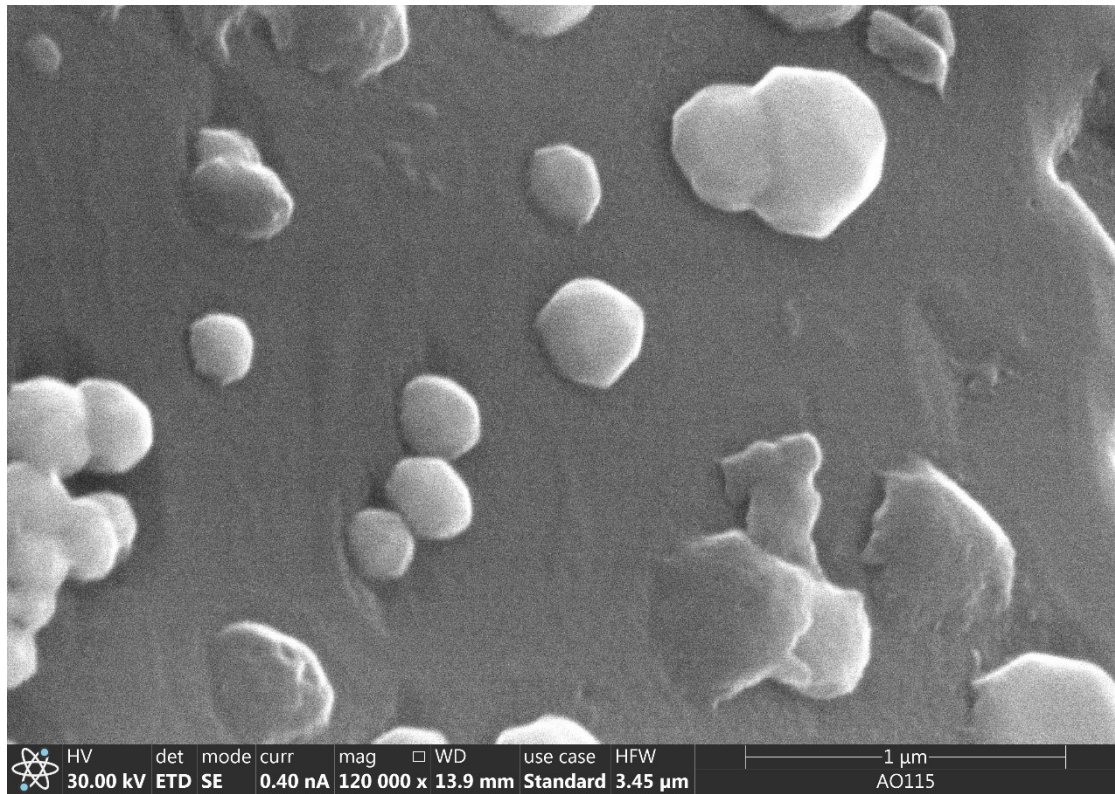

Fig. S1. SEM image of the LSSOC:Eu,Ho phosphors.

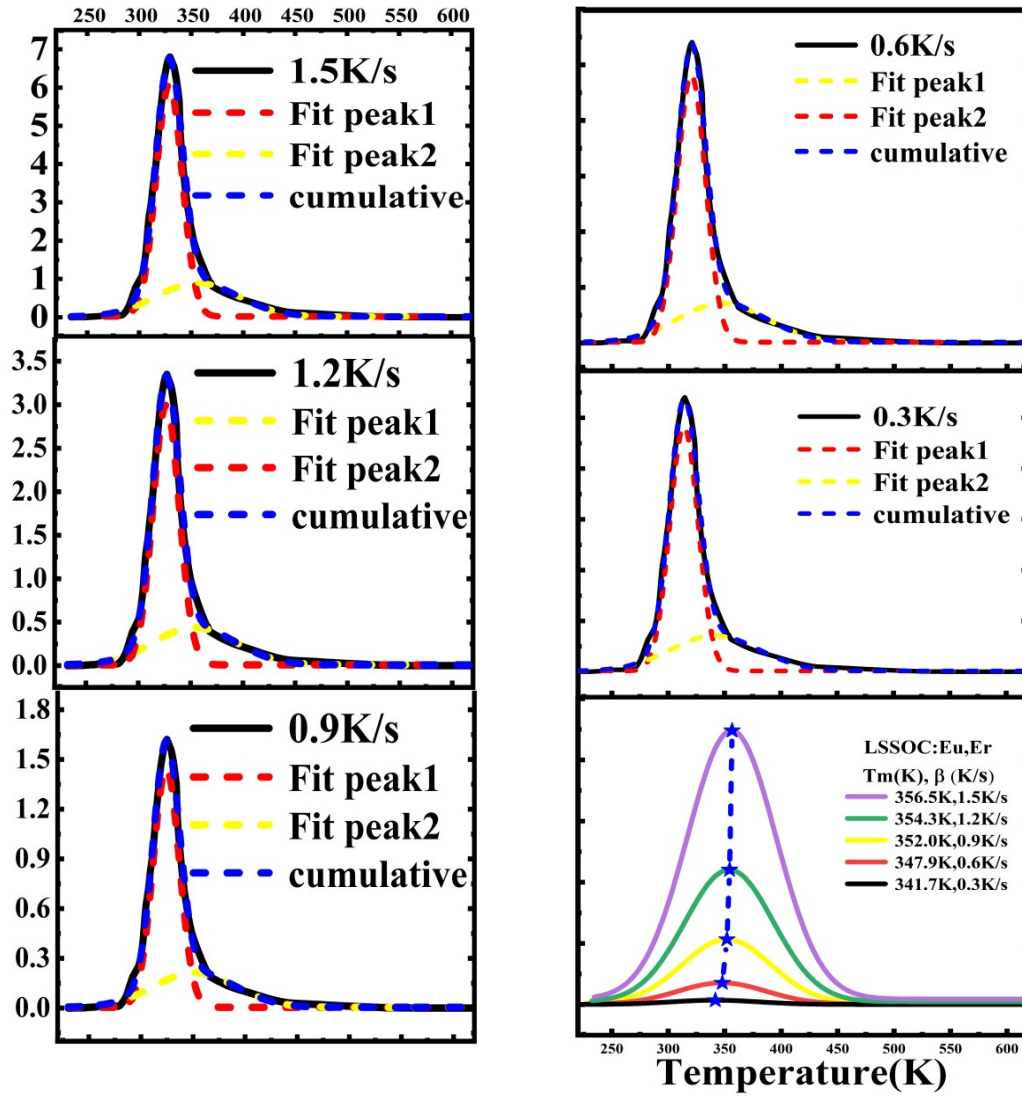

Fig. S2. The fitting TL curve of band A and band B in LSSOC:Eu,Er. And the fitting TL curve only the bands B decided by Er under some heating rate of 1.5, 1.2, 0.9, 0.6, 0.3K/s, respectively.

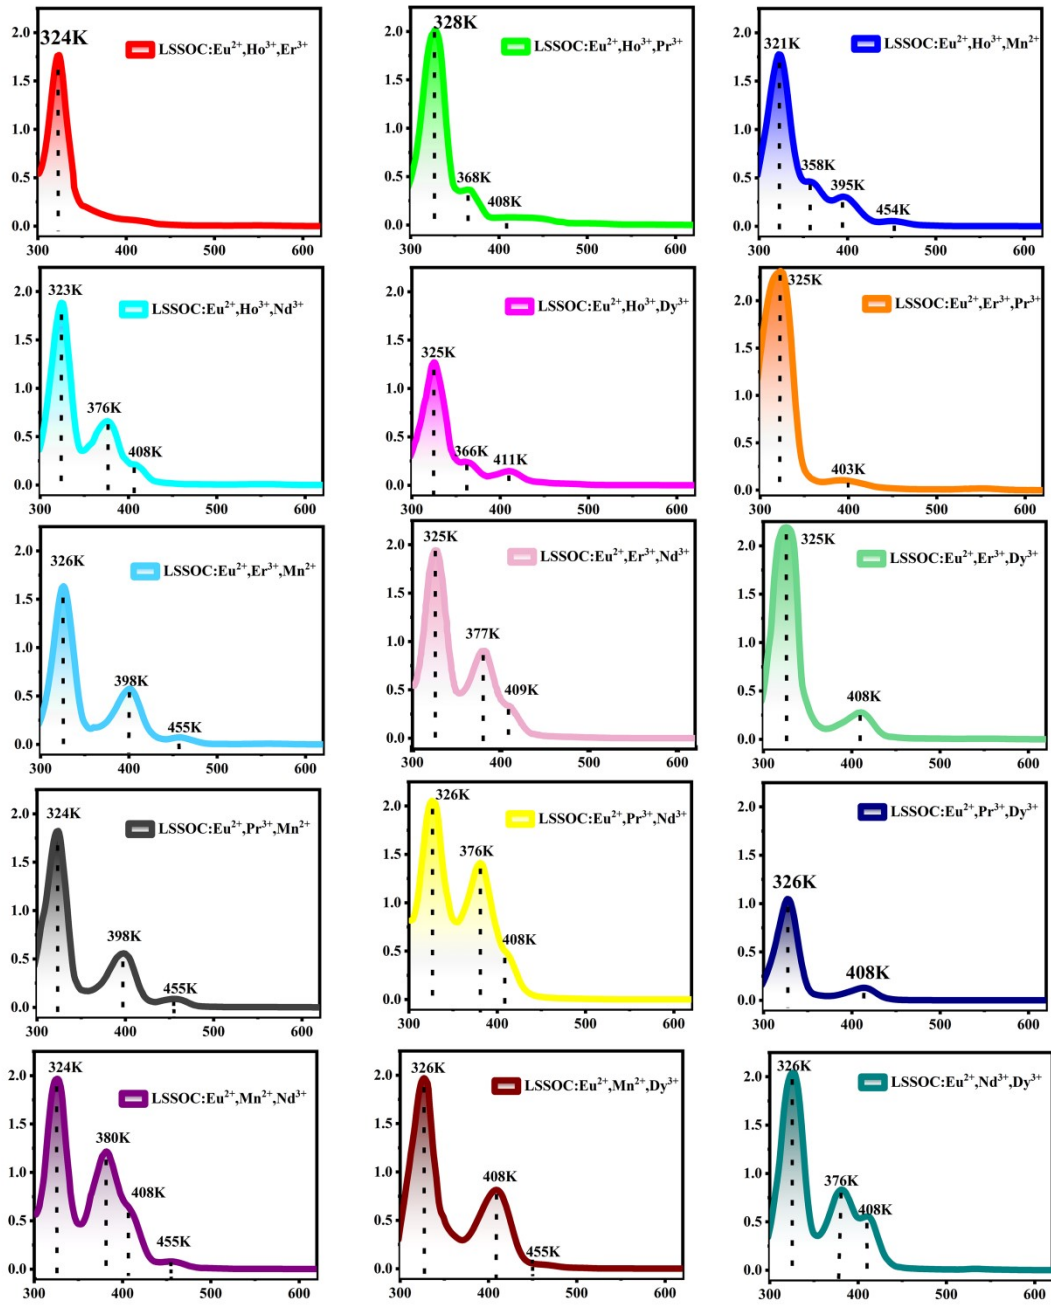

Fig. S3. The TL curves ( $\times 10^6$ ) which were been codoped by two species of the six ions ( $\text{Dy}^{3+}$ ,  $\text{Ho}^{3+}$ ,  $\text{Er}^{3+}$ ,  $\text{Mn}^{2+}$ ,  $\text{Nd}^{3+}$ ,  $\text{Pr}^{3+}$ ) with LSSOC:Eu at the heating rate of 0.9 K/s.

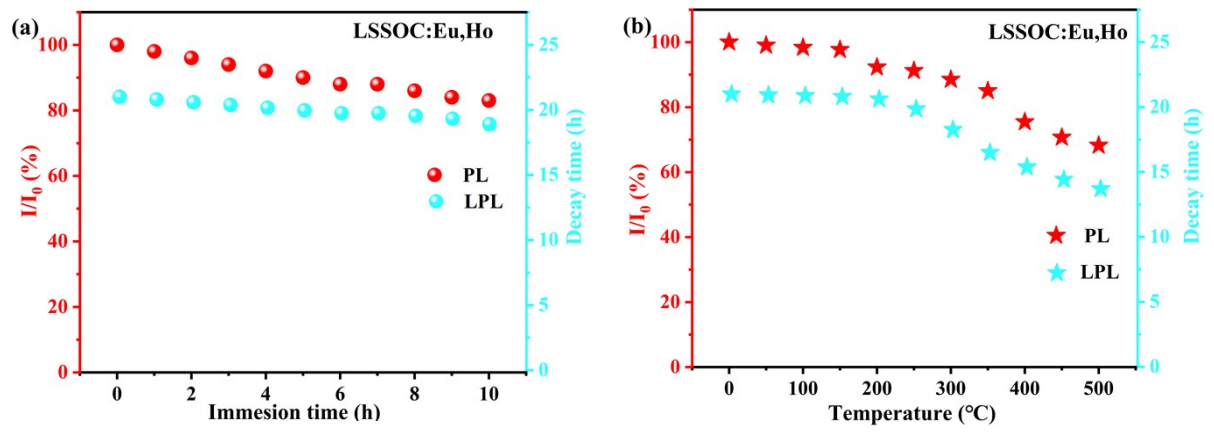

Fig. S4. (a) Water resistance tests of the LSSOC:Eu,Ho after being placed in tap water for different time. (b) Temperature resistance tests of the LSSOC:Eu,Ho after being sintered in tube furnace for 1 h at different temperature.



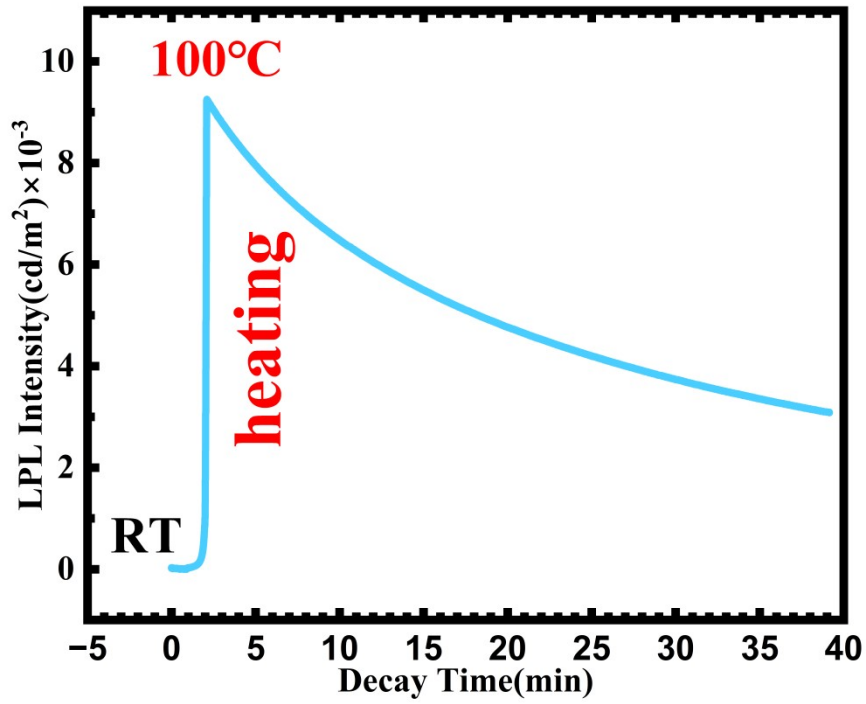

Fig. S5. Intensity of readout signal from the LSSOC:Eu, Ho under high-temperature thermal stimulation (100 °C, from the second minute). Before the readout, the sample was exposed by UV light for 10 min and kept in the dark for 10 days at RT.
